# Supplementary material for: Blue light induces major changes in the gene expression profile of the cyanobacterium Synechocystis sp. PCC 6803
Source: PubMed Central journal article supplement (PMC7496141; doi:10.1111/ppl.13086), 2020-03-14
Supplement: PPL-170-10-s003.pdf [file PPL-170-10-s003.pdf]

**Table S1: Loop design used to hybridize samples to the microarray chips.**

| <b>Color</b> | <b>Sample</b>        | <b>Replicate</b> | <b>Array</b> | <b>Dye</b> | <b>Chip</b> |
|--------------|----------------------|------------------|--------------|------------|-------------|
| 'white'      | t = 0 h              | 1                | 1            | Cy3        | 1           |
| 'white'      | t = 0 h              | 2                | 10           | Cy5        | 1           |
| 'white'      | t = 0 h              | 3                | 11           | Cy3        | 1           |
| 'white'      | t = 0 h              | 4                | 12           | Cy5        | 1           |
| 'white'      | t = 0 h              | 5                | 13           | Cy3        | 1           |
| blue         | t = 1 h              | 1                | 1            | Cy5        | 1           |
| blue         | t = 1 h              | 2                | 2            | Cy3        | 1           |
| blue         | t = 1 h              | 3                | 15           | Cy5        | 1           |
| blue         | t = 4 h              | 1                | 2            | Cy5        | 1           |
| blue         | t = 4 h              | 2                | 3            | Cy3        | 1           |
| blue         | t = 4 h              | 3                | 16           | Cy5        | 1           |
| blue         | t = 8 h              | 1                | 3            | Cy5        | 1           |
| blue         | t = 8 h              | 2                | 4            | Cy3        | 1           |
| blue         | t = 8 h              | 3                | 14           | Cy5        | 1           |
| blue         | t = 24 h             | 1                | 4            | Cy5        | 1           |
| blue         | t = 24 h             | 2                | 5            | Cy3        | 1           |
| blue         | t = 24 h             | 3                | 15           | Cy3        | 1           |
| blue         | t = 192 h            | 1                | 5            | Cy5        | 1           |
| blue         | t = 192 h            | 2                | 6            | Cy3        | 1           |
| blue         | t = 192 h            | 3                | 11           | Cy5        | 1           |
| orange       | t = 4 h              | 1                | 9            | Cy5        | 1           |
| orange       | t = 4 h              | 2                | 10           | Cy3        | 1           |
| orange       | t = 4 h              | 3                | 14           | Cy3        | 1           |
| orange       | t = 192 h            | 1                | 6            | Cy5        | 1           |
| orange       | t = 192 h            | 2                | 7            | Cy3        | 1           |
| orange       | t = 192 h            | 3                | 13           | Cy5        | 1           |
| red          | t = 4 h              | 1                | 8            | Cy5        | 1           |
| red          | t = 4 h              | 2                | 9            | Cy3        | 1           |
| red          | t = 4 h              | 3                | 16           | Cy3        | 1           |
| red          | t = 192 h            | 1                | 7            | Cy5        | 1           |
| red          | t = 192 h            | 2                | 8            | Cy3        | 1           |
| red          | t = 192 h            | 3                | 12           | Cy3        | 1           |
| red          | t = 192 h            | 1                | 3            | Cy5        | 2           |
| red          | t = 192 h            | 2                | 4            | Cy3        | 2           |
| red          | t = 192 h            | 3                | 6            | Cy3        | 2           |
| red          | red dilute t = 192 h | 1                | 4            | Cy5        | 2           |
| red          | red dilute t = 192 h | 2                | 5            | Cy3        | 2           |
| red          | red dilute t = 192 h | 3                | 7            | Cy3        | 2           |
| blue         | t = 48 h             | 1                | 1            | Cy5        | 2           |
| blue         | t = 48 h             | 2                | 2            | Cy3        | 2           |
| blue         | t = 48 h             | 3                | 7            | Cy5        | 2           |
| blue         | t = 192 h            | 1                | 2            | Cy5        | 2           |
| blue         | t = 192 h            | 2                | 3            | Cy3        | 2           |
| blue         | t = 192 h            | 3                | 8            | Cy3        | 2           |
| 'white'      | t = 0 h              | 4                | 8            | Cy5        | 2           |
| 'white'      | t = 0 h              | 1                | 1            | Cy3        | 2           |
| 'white'      | t = 0 h              | 2                | 5            | Cy5        | 2           |
| 'white'      | t = 0 h              | 3                | 6            | Cy5        | 2           |
